# Supplementary material
Source: publisher figshare collection journal article supplement (https://acs.figshare.com/ndownloader/files/4690657)
Supplement: Supplementary file 1 [file 4690657]

**Supporting information**

Part A: 1H-NMR and MALDI-TOF data of all synthesized amines.

***2. N*-benzyl-*N*-4-fluorobenzylamine:** Light yellow liquid. 1H NMR (300 MHz, CDCl3, 25 ºC): δ= 7.4 (m, 5H, C6*H*5), 7.2 (d, 4H, C6*H*4), 3.8 (d, 4H, 2CH2). Mw= [M+H] = 215.7419 g/mol

***3. Bis-*(4-fluorobenzyl)amine:** Yellow liquid. 1H NMR (300 MHz, CDCl3, 25 ºC): δ= 7.3 (m, 4H, C6*H*4), 6.9 (m, 4H, C6*H*4), 3.8 (d, 4H, 2CH2). Mw= [M+H] = 233.5966 g/mol

***4. N*-4-cyanobenzyl-benzonitrile:** *(For this reaction, the general reaction procedure was followed, except during the reduction step, the solution was not refluxed, but only allowed to stir at room temperature for 4 hours.)* Yellow-brown liquid. 1H NMR (300 MHz, CDCl3, 25 ºC): δ= 7.6 (d, 2H, C6*H*4), 7.5 (d, 2H, C6*H*4), 7.3 (m, 5H, C6*H*5), 4.1(s, 2H, C*H*2), 3.9(s, 2H, C*H*2). Mw= [M+H] = 223.0410 g/mol

***5. N*-benzyl-N-4-methoxybenzylamine:** Light yellow liquid. 1H NMR (300 MHz, CDCl3, 25 ºC): δ= 7.3 (m, 5H, C6*H*5), 7.2 (d, 2H, C6*H*4), 6.9 (d, 2H, C6*H*4), 3.8(d, 7H, 2C*H*2, OC*H*3). Mw= [M+H] = 227.7604 g/mol

***6. Bis-*(4-methoxybenzyl)amine:** Yellow liquid. 1H NMR (300 MHz, CDCl3, 25 ºC): δ= 7.6 (d, 4H, 2C6*H*4), 7.3 (d, 4H, 2C6*H*4), 4.1(s, 6H, OC*H*3), 3.9(s, 4H, 2C*H*2). Mw= [M+H] = 258.8854 g/mol

***7. Bis-*(2,4-dimethoxybenzyl)amine:** (*Purchased from Merck KGaA, 99%)*. Almond coloured powder. 1H NMR (300 MHz, CDCl3, 25 ºC): δ= 7.1 (d, 2H, C6*H*3), 3.8 (d, 12H, 2xOCH3), 3.7 (s, 2H, C*H*2). Mw= [M+H] = 317.5214 g/mol

***8. N*-benzylaniline:** Brown liquid. 1H NMR (300 MHz, CDCl3, 25 ºC): δ= 7.3 (m, 5H, C6*H*5), 7.2 (d, 2H, C6*H*4), 6.7 (m, 3H, C6*H*5), 4.3(s, 2H, C*H*2). Mw= [M+H] = 183.8854 g/mol

***9. N*-benzyl-4-fluoroaniline:** Light brown liquid. 1H NMR (300 MHz, CDCl3, 25 ºC): δ= 7.3 (m, 5H, C6*H*5), 6.8 (t, 2H, C6*H*4), 6.6 (q, 2H, C6*H*4), 4.3 (s, 2H, C*H*2). Mw= [M+H] = 201.8775 g/mol

***10. N*-benzyl-4-methoxyaniline:** Dark, black brown liquid. 1H NMR (300 MHz, CDCl3, 25 ºC): δ= 7.3 (m, 5H, C6*H*5), 6.8 (d, 2H, C6*H*4), 6.6 (d, 2H, C6*H*4), 4.3(s, 2H, C*H*2), 3.7(s, 3H, OC*H*2). Mw= [M+H] = 213.4167 g/mol

***11. N*-benzylnaphthalen-1-ylmethanamine**: Brown liquid, 1H NMR (300 MHz, CDCl3, 25 ºC): δ= 8.1 (d, 1H, C10*H*7), 7.8 (dd, 2H, C10*H*7), 7.3 (m, 9H, C6*H*5, C10*H*7), 4.3 (s, 2H, C*H*2), 3.9 (s, 2H, C*H*2). Mw= [M+H] = 247.7438 g/mol

**12. 1-(9-anthryl)-*N*-benzylmethanamine:** Yellow solid. 1H NMR (300 MHz, CDCl3, 25 ºC): δ= 8.4 (s, 1H, C14*H*9), 8.2 (d, 2H, C14*H*9), 8.0 (d, 2H, C14*H*9), 7.3 (m, 11H, C6H5, C10*H*7), 4.7 (s, 2H, C*H*2), 4.0 (s, 2H, C*H*2). Mw= [M+H] = 297.0961 g/mol

**13. *Bis-(*1-naphthylmethyl)amine:** Brown liquid, 1H NMR (300 MHz, CDCl3, 25 ºC): δ= 8.1 (d, 2H, 2C10*H*7), 7.9 (d, 2H, 2C10*H*7), 7.8 (d, 2H, 2C10*H*7), 7.3 (m, 8H, 2C10*H*7), 4.4 (s, 4H, 2C*H*2). Mw= [M+H] = 297.8560 g/mol

**14. 1-(1-pyrenyl)-*N*-benzylmethanamine:** Orange solid. 1H NMR (300 MHz, CDCl3, 25 ºC): δ= 8.3 (d, 1H, C16*H*9), 8.0 (m, 8H, C16*H*9), 7.3 (m, 5H, C6*H*5), 4.0 (s, 2H, C*H*2). Mw= [M+H] = 321.8269 g/mol

**15. 1-(1-naphthyl)-*N*-(1-naphthylmethyl)methanamine:** White flakes. 1H NMR (300 MHz, (C6D6, 25 ºC): δ= 8.1 (d, 1H, C10*H*7), 7.8 (d, 2H, C10*H*7), 7.7 (d, 2H, C10*H*7), 7.3 (m, 7H, C10*H*7), 4.6 (d, 2H, C*H*2). Mw= [M+H] = 282.5986 g/mol

Part B: Tabulated data of the etch rates and etch selectivity of the amine molecules used in this study

| Amine identity | **K*u*** (nm/min) | **K*e*** (nm/min) | Selectivity (γ) |
| --- | --- | --- | --- |
| 1 | 476 | 379 | 1.26 |
| 2 | 306 | 212 | 1.44 |
| 3 | 207 | 114 | 1.81 |
| 4 | 188 | 30 | 6.27 |
| 5 | 513 | 219 | 2.34 |
| 6 | 826 | 304 | 2.72 |
| 7 | 1020 | 349 | 2.92 |
| 8 | NR | NR | - |
| 9 | NR | NR | - |
| 10 | NR | NR | - |
| 11 | 111 | 33 | 3.36 |
| 12 | 84.7 | 5.02 | 16.87 |
| 13 | 59.7 | 5.31 | 11.24 |
| 14 | 98 | 0.87 | 113.79 |
| 15 | NR | NR | - |
| 16 | 210 | 0.61 | 344.26 |
| triethylamine | NR | NR | - |
